# Supplementary material
Source: PubMed Central journal article supplement (PMC3366851)

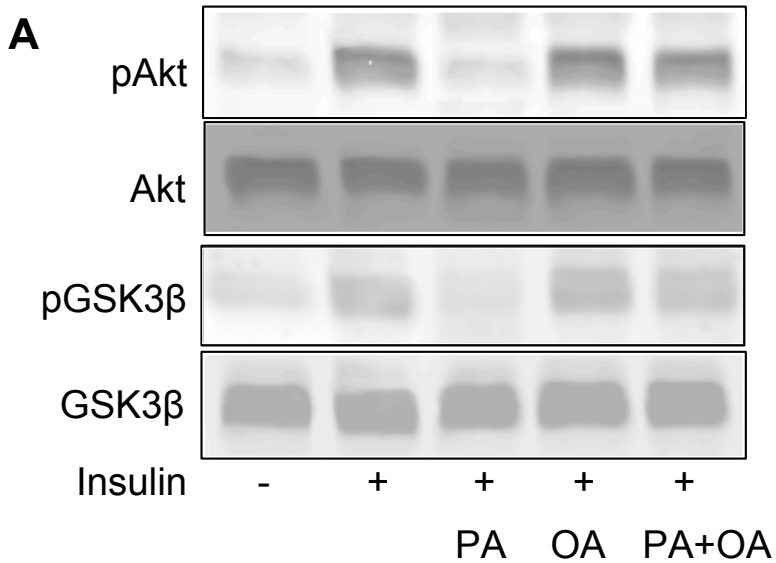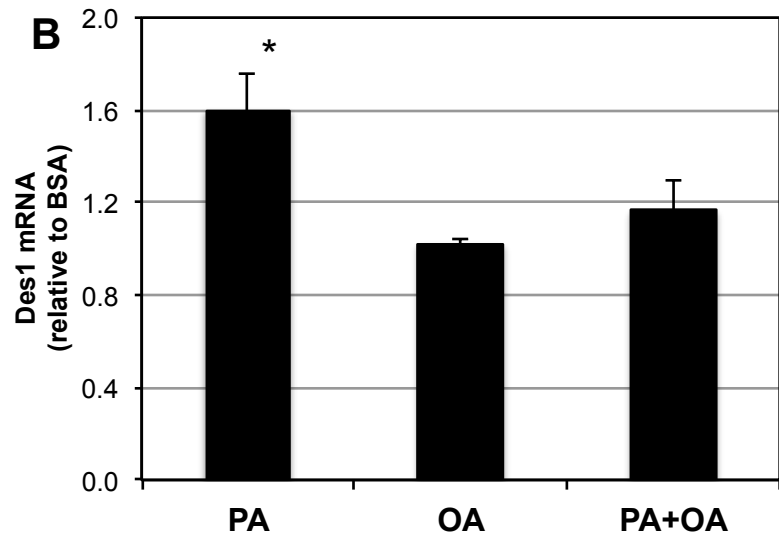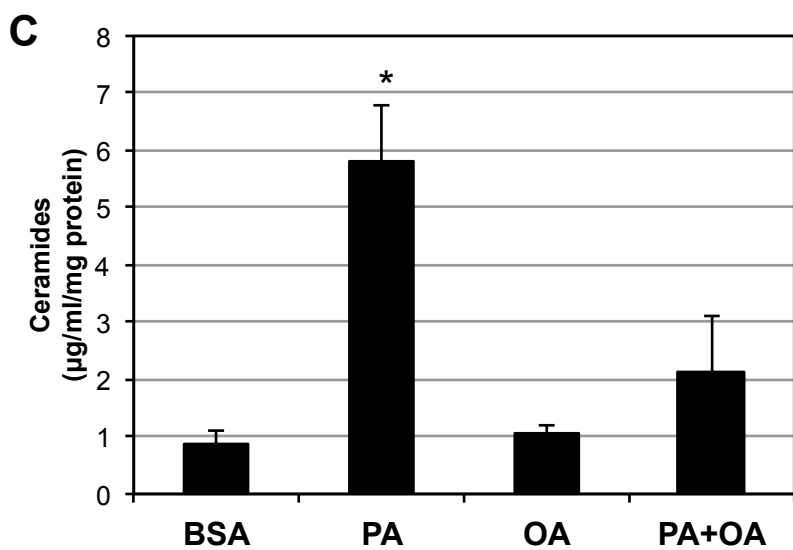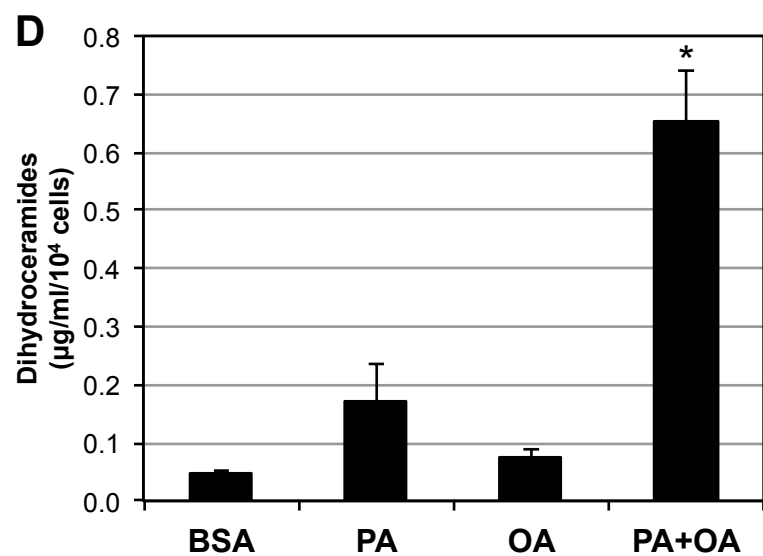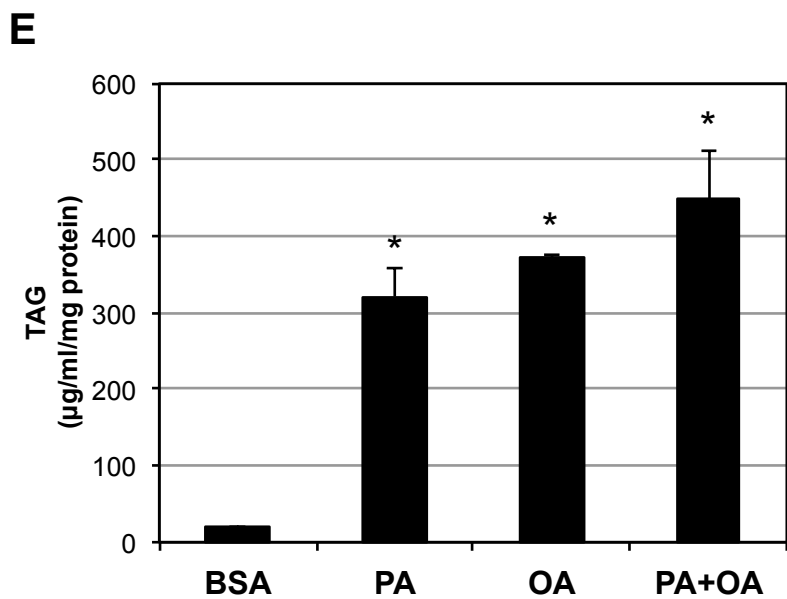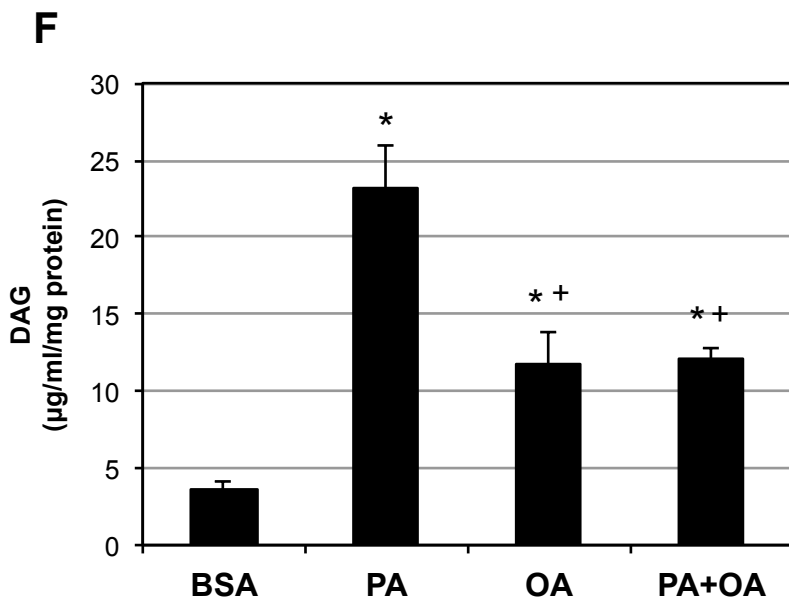

Supplement: supp_M112.359950_FEN_Sup_Figure_1.pdf [file supp_M112.359950_FEN_Sup_Figure_1.pdf]
